# Supplementary material for: Deciphering the potential anti-COVID-19 active ingredients inAndrographis paniculata(Burm. F.) Nees by combination of network pharmacology, molecular docking, and molecular dynamics
Source: Royal Society of Chemistry journal article supplement (doi:10.1039/d1ra06487h), 2021-01-01
Supplement: d1ra06487h1.pdf [file d1ra06487h1.pdf]

**Table 1.** Screening results of the main active ingredients of *A. paniculata*

| No. | Mol ID    | Molecule Name                                                                                  | MW     | OB (%) | DL   | Caco-2 |
|-----|-----------|------------------------------------------------------------------------------------------------|--------|--------|------|--------|
| 1   | MOL000173 | wogonin                                                                                        | 284.28 | 30.68  | 0.23 | 0.79   |
| 2   | MOL002928 | oroxylin a                                                                                     | 284.28 | 41.37  | 0.23 | 0.76   |
| 3   | MOL002932 | Panicolin                                                                                      | 314.31 | 76.26  | 0.29 | 0.84   |
| 4   | MOL008203 | 14-deoxy-11-oxo-andrographolide                                                                | 348.48 | 57.06  | 0.34 | -0.09  |
| 5   | MOL008204 | Mono-O-methylwightin                                                                           | 358.37 | 103.11 | 0.40 | 0.94   |
| 6   | MOL008206 | Moslosooflavone                                                                                | 298.31 | 44.09  | 0.25 | 1.01   |
| 7   | MOL008209 | Deoxycamptothecine                                                                             | 332.38 | 50.01  | 0.77 | 0.68   |
| 8   | MOL008210 | Deoxyelephantopin                                                                              | 344.39 | 105.32 | 0.4  | 0.26   |
| 9   | MOL008213 | 14-deoxy-12-methoxyandrographolide                                                             | 364.53 | 70.29  | 0.36 | -0.03  |
| 10  | MOL008215 | Paniculide B                                                                                   | 280.35 | 52.27  | 0.21 | 0.03   |
| 11  | MOL008216 | Paniculide C                                                                                   | 278.33 | 79.73  | 0.21 | 0.02   |
| 12  | MOL008217 | Paniculogenin                                                                                  | 448.71 | 47.66  | 0.75 | -0.2   |
| 13  | MOL008218 | 1-Monoolein                                                                                    | 356.61 | 34.13  | 0.3  | 0.23   |
| 14  | MOL008219 | 3-[2-[(1R,4aS,5R,8aS)-5,8a-dimethyl-2-methylene-5-methylol-decalin-1-yl]ethyl]-5H-furan-2-one  | 318.50 | 51.78  | 0.28 | 0.69   |
| 15  | MOL008222 | andrographidine B_qt                                                                           | 330.31 | 72.72  | 0.33 | 0.6    |
| 16  | MOL008223 | andrographidine C                                                                              | 460.47 | 56.85  | 0.77 | -0.6   |
| 17  | MOL008226 | 14-deoxyandrographolide                                                                        | 334.50 | 56.3   | 0.31 | 0.17   |
| 18  | MOL008228 | Andrographin                                                                                   | 328.34 | 37.57  | 0.33 | 0.73   |
| 19  | MOL008229 | Andrographin F                                                                                 | 536.53 | 33.34  | 0.85 | -0.84  |
| 20  | MOL008230 | andrographidine F_qt                                                                           | 374.37 | 77.13  | 0.45 | 0.91   |
| 21  | MOL008232 | Andrographolide                                                                                | 350.50 | 46.96  | 0.36 | -0.25  |
| 22  | MOL008234 | andrographolide-19-β-D-glucoside_qt                                                            | 350.50 | 53.44  | 0.35 | -0.30  |
| 23  | MOL008238 | 3-[2-[(1S,4aR,5S,8aR)-5,8a-dimethyl-2-methylene-5-methylol-decalin-1-yl] ethyl]-5H-furan-2-one | 318.50 | 63.54  | 0.28 | 0.68   |
| 24  | MOL008239 | Quercetin tetramethyl (3',4',5,7) ether                                                        | 358.37 | 31.57  | 0.41 | 0.90   |

| Sybyl 1.3        |             | AutoDock Vina    |                                          |
|------------------|-------------|------------------|------------------------------------------|
| Symbol/Ligand    | Total Score | Symbol/Ligand    | Binding energy (kcal mol <sup>-1</sup> ) |
| NOS2/MOL008218   | 10.076      | NOS2/MOL008209   | -11.0                                    |
| PPARG/MOL008218  | 9.718       | F10/MOL008223    | -9.8                                     |
| EGFR/MOL008218   | 9.3271      | NOS2/MOL000173   | -9.7                                     |
| PIK3CG/MOL008218 | 9.3038      | NOS2/MOL002932   | -9.7                                     |
| ACE2/MOL008218   | 9.1932      | NOS2/MOL002928   | -9.6                                     |
| F10/MOL008218    | 8.8676      | NOS2/MOL008206   | -9.6                                     |
| PTGS1/MOL008218  | 8.7675      | NOS2/MOL008228   | -9.6                                     |
| PTGS2/MOL008218  | 8.1999      | NOS2/MOL008223   | -9.4                                     |
| DPP4/MOL008218   | 7.7884      | PPARG/MOL008209  | -9.4                                     |
| MAPK14/MOL008239 | 7.3153      | PIK3CG/MOL008209 | -9.3                                     |
| PARP1/MOL008229  | 5.5767      | ACE2/MOL008217   | -9.8                                     |

**Table 2.** The best ingredients to interface with key proteins predicted by Sybyl 1.3 and AutoDock Vina
